# Supplementary material
Source: publisher figshare collection journal article supplement (https://frontiersin.figshare.com/ndownloader/files/23234846)
Supplement: Supplementary file [file 23234846]

## Supplementary Material

### Supplementary Tables

**Supplementary Table 1** Characteristics of the patients matched by PSM

| Characteristics                 | Number of patients (%) | PNI<49    | PNI≥49    | P     |
|---------------------------------|------------------------|-----------|-----------|-------|
| Age                             |                        |           |           |       |
| ≤60 y                           | 130 (82.3)             | 64 (81.0) | 66 (83.5) | 0.677 |
| >60 y                           | 28 (17.7)              | 15 (19.0) | 13 (16.5) |       |
| Sex                             |                        |           |           |       |
| Male                            | 126 (79.7)             | 61 (77.2) | 65 (82.3) | 0.428 |
| Female                          | 32 (20.3)              | 18 (22.8) | 14 (17.7) |       |
| ECOG score                      |                        |           |           |       |
| 0-1                             | 131 (82.9)             | 64 (81.0) | 67 (84.8) | 0.526 |
| ≥2                              | 27 (17.1)              | 15 (19.0) | 12 (15.2) |       |
| Serum LDH                       |                        |           |           |       |
| ≤245 u/l                        | 117 (74.1)             | 57 (72.2) | 60 (75.9) | 0.586 |
| >245 u/l                        | 41 (25.9)              | 22 (27.8) | 19 (24.1) |       |
| B symptoms                      |                        |           |           |       |
| No                              | 98 (62.0)              | 46 (58.2) | 52 (65.8) | 0.325 |
| Yes                             | 60 (38.0)              | 33 (41.8) | 27 (34.2) |       |
| Extranodal sites of involvement |                        |           |           |       |
| <2                              | 137 (86.7)             | 66 (83.5) | 71 (89.9) | 0.241 |
| ≥2                              | 21 (13.3)              | 13 (16.5) | 8 (10.1)  |       |
| Ann Arbor Stage                 |                        |           |           |       |
| I-II                            | 121 (76.6)             | 57 (72.2) | 64 (81.0) | 0.189 |
| III-IV                          | 37 (23.4)              | 22 (27.8) | 15 (19.0) |       |
| Subtype                         |                        |           |           |       |
| UNKTL                           | 146 (92.4)             | 74 (93.7) | 72 (91.1) | 0.548 |
| EUNKTL                          | 12 (7.6)               | 5 (6.3)   | 7 (8.9)   |       |
| Regional lymph node involvement |                        |           |           |       |
| No                              | 98 (62.0)              | 46 (58.2) | 52 (65.8) | 0.325 |
| Yes                             | 60 (38.0)              | 33 (41.8) | 27 (34.2) |       |
| KPI score                       |                        |           |           |       |
| 0-1                             | 102 (64.6)             | 45 (57.0) | 57 (72.2) | 0.046 |
| 2-4                             | 56 (35.4)              | 34 (43.0) | 22 (27.8) |       |
| IPI score                       |                        |           |           |       |
| 0-1                             | 122 (77.2)             | 60 (75.9) | 62 (78.5) | 0.704 |
| 2-5                             | 36 (22.8)              | 19 (24.1) | 17 (21.5) |       |
| PIT score                       |                        |           |           |       |
| 0-1                             | 143 (90.5)             | 71 (89.9) | 72 (91.1) | 0.786 |
| 2-4                             | 15 (9.5)               | 8 (10.1)  | 7 (8.9)   |       |
| PINK score                      |                        |           |           |       |
| 0                               | 86 (54.4)              | 41 (51.9) | 45 (57.0) | 0.413 |
| 1                               | 35 (22.2)              | 16 (20.3) | 19 (24.1) |       |

|                      |           |           |           |       |
|----------------------|-----------|-----------|-----------|-------|
| ≥2                   | 37 (23.4) | 22 (27.8) | 15 (19.0) |       |
| Treatment modalities |           |           |           |       |
| RT alone             | 13 (8.2)  | 7 (8.9)   | 6 (7.6)   | 0.533 |
| CT alone             | 52 (32.9) | 29 (36.7) | 23 (29.1) |       |
| CRT                  | 93 (32.9) | 43 (54.4) | 50 (63.3) |       |
| CT regimen           |           |           |           |       |
| L-Asp-based          | 75 (51.7) | 37 (51.4) | 38 (52.1) | 1.000 |
| Other                | 70 (48.3) | 42 (48.6) | 35 (47.9) |       |

**PNI**, Prognostic nutritional index; **LDH**, lactate dehydrogenase; **ECOG**, Eastern Cooperative Oncology Group; **IPI**, International Prognostic Index; **KPI**, Korean Prognostic Index; **PINK**, prognostic index of natural killer lymphoma; **PTI**, Prognostic Index for T-cell lymphoma; **RT**, radiotherapy; **CT**, Chemotherapy; **CRT**, Chemoradiotherapy; **L-Asp**, L-Asparaginase.

**Supplementary Table 2** Univariate and multivariate analysis of the PSM patients

| Factors                                               | OS                                    |                                                   |       | PFS                                   |                                                   |       |
|-------------------------------------------------------|---------------------------------------|---------------------------------------------------|-------|---------------------------------------|---------------------------------------------------|-------|
|                                                       | Univariate analysis<br><i>p</i> value | Multivariate analysis<br>RR(95%CI) <i>p</i> value |       | Univariate analysis<br><i>p</i> value | Multivariate analysis<br>RR(95%CI) <i>p</i> value |       |
| <b>Age</b>                                            |                                       |                                                   |       |                                       |                                                   |       |
| >60 y vs. ≤60 y                                       | 0.129                                 |                                                   |       | 0.308                                 |                                                   |       |
| <b>Sex</b>                                            |                                       |                                                   |       |                                       |                                                   |       |
| Female vs. Male                                       | 0.225                                 |                                                   |       | 0.240                                 |                                                   |       |
| <b>ECOG score</b>                                     |                                       |                                                   |       |                                       |                                                   |       |
| ≥2 vs. 0-1                                            | <0.001*                               | 2.005(1.149-3.499)                                | 0.014 | <0.001*                               | 2.194(1.290-3.729)                                | 0.004 |
| <b>Ann Arbor Stage</b>                                |                                       |                                                   |       |                                       |                                                   |       |
| III-IV vs. I-II                                       | 0.294                                 |                                                   |       | 0.664                                 |                                                   |       |
| <b>B symptoms</b>                                     |                                       |                                                   |       |                                       |                                                   |       |
| yes vs. no                                            | 0.494                                 |                                                   |       | 0.596                                 |                                                   |       |
| <b>Extranodal sites of involvement</b>                |                                       |                                                   |       |                                       |                                                   |       |
| ≥2 vs. <2                                             | 0.213                                 |                                                   |       | 0.370                                 |                                                   |       |
| <b>Regional lymph node involvement</b>                |                                       |                                                   |       |                                       |                                                   |       |
| yes vs. no                                            | 0.049*                                |                                                   |       | 0.110                                 |                                                   |       |
| <b>Subtype</b>                                        |                                       |                                                   |       |                                       |                                                   |       |
| EUNKTL vs. UNKTL                                      | 0.571                                 |                                                   |       | 0.897                                 |                                                   |       |
| <b>KPI</b>                                            |                                       |                                                   |       |                                       |                                                   |       |
| 2-4 vs. 0-1                                           | 0.123                                 |                                                   |       | 0.229                                 |                                                   |       |
| <b>PIT</b>                                            |                                       |                                                   |       |                                       |                                                   |       |
| 2-4 vs. 0-1                                           | <0.001*                               | 2.481(1.268-4.854)                                | 0.008 | 0.003*                                |                                                   |       |
| <b>IPI</b>                                            |                                       |                                                   |       |                                       |                                                   |       |
| 2-5 vs. 0-1                                           | 0.071*                                |                                                   |       | 0.264                                 |                                                   |       |
| <b>PINK</b>                                           |                                       |                                                   |       |                                       |                                                   |       |
| 0                                                     |                                       |                                                   |       |                                       |                                                   |       |
| 1                                                     |                                       |                                                   |       |                                       |                                                   |       |
| ≥2                                                    | 0.027*                                |                                                   |       | 0.123                                 |                                                   |       |
| <b>Neutrophil</b>                                     |                                       |                                                   |       |                                       |                                                   |       |
| >3.0 x10 <sup>9</sup> /l vs. ≤3.0 x10 <sup>9</sup> /l | 0.230                                 |                                                   |       | 0.333                                 |                                                   |       |
| <b>Baseline white cell count</b>                      |                                       |                                                   |       |                                       |                                                   |       |

|                                                          |        |                    |       |        |                    |       |
|----------------------------------------------------------|--------|--------------------|-------|--------|--------------------|-------|
| >5.0 x10 <sup>9</sup> /l vs.<br>≤5.0 x10 <sup>9</sup> /l | 0.533  |                    |       | 0.601  |                    |       |
| <b>Platelets</b>                                         |        |                    |       |        |                    |       |
| >200 x10 <sup>9</sup> /l vs.<br>≤200 x10 <sup>9</sup> /l | 0.462  |                    |       | 0.690  |                    |       |
| <b>Serum LDH</b>                                         |        |                    |       |        |                    |       |
| >245u/l vs.<br>≤245u/l                                   | 0.085* |                    |       | 0.284  |                    |       |
| <b>Hb</b>                                                |        |                    |       |        |                    |       |
| >120g/l vs.<br>≤120g/l                                   | 0.096* |                    |       | 0.155  |                    |       |
| <b>PNI</b>                                               |        |                    |       |        |                    |       |
| ≥49 vs. <49                                              | 0.004* | 0.522(0.318-0.858) | 0.010 | 0.019* | 0.609(0.385-0.963) | 0.034 |
| <b>RT</b>                                                |        |                    |       |        |                    |       |
| received vs.<br>unreceived                               | 0.037* |                    |       | 0.015* | 0.618(0.390-0.981) | 0.041 |
| <b>L-Asp-based</b>                                       |        |                    |       |        |                    |       |
| <b>CT</b>                                                |        |                    |       |        |                    |       |
| received vs.<br>unreceived                               | 0.003* | 0.510(0.304-0.856) | 0.011 | 0.003* | 0.524(0.326-0.843) | 0.008 |

**PNI**, Prognostic nutritional index; **LDH**, lactate dehydrogenase; **ECOG**, Eastern Cooperative Oncology Group; **IPI**, International Prognostic Index; **KPI**, Korean Prognostic Index; **PINK**, Prognostic index of natural killer lymphoma; **PTI**, Prognostic Index for T-cell lymphoma; **RT**, radiotherapy; **L-Asp**, L-Asparaginase; **CT**, Chemotherapy.

**Supplementary Table 3** Univariate and multivariate analysis of the patients treated with L-Asp-based chemotherapy.

| Factors                         | OS                                    |                       |                | PFS                                   |                       |                |
|---------------------------------|---------------------------------------|-----------------------|----------------|---------------------------------------|-----------------------|----------------|
|                                 | Univariate analysis<br><i>p</i> value | Multivariate analysis |                | Univariate analysis<br><i>p</i> value | Multivariate analysis |                |
|                                 |                                       | RR(95%CI)             | <i>p</i> value |                                       | RR(95%CI)             | <i>p</i> value |
| Age                             | 0.995                                 |                       |                | 0.925                                 |                       |                |
| Sex                             | 0.910                                 |                       |                | 0.571                                 |                       |                |
| ECOG score                      | 0.037*                                | 2.324(0.972-5.556)    | 0.058          | 0.069*                                | 2.139(0.917-4.993)    | 0.079          |
| Ann Arbor Stage                 | 0.072*                                |                       |                | 0.263                                 |                       |                |
| B symptoms                      | 0.211                                 |                       |                | 0.384                                 |                       |                |
| Extranodal sites of involvement | 0.191                                 |                       |                | 0.421                                 |                       |                |
| Regional lymph node involvement | 0.074*                                | 2.233(1.026-4.864)    | 0.043          | 0.092*                                | 1.980(0.961-4.079)    | 0.064          |
| Subtype                         | 0.990                                 |                       |                | 0.785                                 |                       |                |
| KPI                             | 0.066*                                |                       |                | 0.127                                 |                       |                |
| PIT                             | 0.041*                                |                       |                | 0.086*                                |                       |                |
| IPI                             | 0.037*                                |                       |                | 0.132                                 |                       |                |
| PINK                            | 0.637                                 |                       |                | 0.971                                 |                       |                |
| Neutrophils                     | 0.808                                 |                       |                | 0.437                                 |                       |                |
| Baseline white cell count       | 0.129                                 |                       |                | 0.123                                 |                       |                |
| Platelets                       | 0.572                                 |                       |                | 0.903                                 |                       |                |

|           |        |                    |       |        |                    |       |
|-----------|--------|--------------------|-------|--------|--------------------|-------|
| Serum LDH | 0.039* |                    |       | 0.198  |                    |       |
| Hb        | 0.778  |                    |       | 0.853  |                    |       |
| PNI       | 0.006* | 0.327(0.137-0.782) | 0.012 | 0.035* | 0.461(0.221-0.961) | 0.039 |
| RT        | 0.094* |                    |       | 0.116  |                    |       |

**PNI**, Prognostic nutritional index; **LDH**, lactate dehydrogenase; **ECOG**, Eastern Cooperative Oncology Group; **IPI**, International Prognostic Index; **KPI**, Korean Prognostic Index; **PINK**, Prognostic index of natural killer lymphoma; **PTI**, Prognostic Index for T-cell lymphoma; **RT**, radiotherapy.

**Supplementary Table 4** The variables and definitions of different models.

| Model and definition (total point) | Variable                                           | point |
|------------------------------------|----------------------------------------------------|-------|
| <b>KPI</b>                         |                                                    |       |
| Group1 (0)                         | Ann Arbor stage (III-IV vs. I-II)                  | 1     |
| Group2 (1)                         | Elevated LDH (yes vs. no)                          | 1     |
| Group3 (2)                         | B symptoms (yes vs. no)                            | 1     |
| Group4 ( $\geq 3$ )                | Regional lymph node (yes vs. no)                   | 1     |
| <b>IPI</b>                         |                                                    |       |
| Low (0-1)                          | Age ( $>60$ years vs. $\leq 60$ years)             | 1     |
| Intermediate low (2)               | Ann Arbor stage (III-IV vs. I-II)                  | 1     |
| Intermediate high (3)              | ECOG score ( $\geq 2$ vs. 0-1)                     | 1     |
| High ( $\geq 4$ )                  | Elevated LDH (yes vs. no)                          | 1     |
|                                    | Distant extranodal involvement ( $\geq 2$ vs. 0-1) | 1     |
| <b>PINK</b>                        |                                                    |       |
| Low risk (0)                       | Age ( $>60$ years vs. $\leq 60$ years)             | 1     |
| Intermediate risk (1)              | Ann Arbor stage (III-IV vs. I-II)                  | 1     |
| High risk ( $\geq 2$ )             | Distant extranodal involvement (yes vs. no)        | 1     |
|                                    | Nonnasal disease (yes vs. no)                      | 1     |
| <b>KPI+PNI</b>                     |                                                    |       |
| Group1 (0)                         | Ann Arbor stage (III-IV vs. I-II)                  | 1     |
| Group2 (1)                         | Elevated LDH (yes vs. no)                          | 1     |
| Group3 (2)                         | B symptoms (yes vs. no)                            | 1     |
| Group4 ( $\geq 3$ )                | Regional lymph node (yes vs. no)                   | 1     |
|                                    | PNI (PNI $<49$ vs. PNI $\geq 49$ )                 | 1     |
| <b>IPI+PNI</b>                     |                                                    |       |
| Low (0-1)                          | Age ( $>60$ years vs. $\leq 60$ years)             | 1     |
| Intermediate low (2)               | Ann Arbor stage (III-IV vs. I-II)                  | 1     |
| Intermediate high (3)              | ECOG score ( $\geq 2$ vs. 0-1)                     | 1     |
| High ( $\geq 4$ )                  | Elevated LDH (yes vs. no)                          | 1     |
|                                    | Distant extranodal involvement ( $\geq 2$ vs. 0-1) | 1     |
|                                    | PNI (PNI $<49$ vs. PNI $\geq 49$ )                 | 1     |
| <b>PINK+PNI</b>                    |                                                    |       |
| Low risk (0)                       | Age ( $>60$ years vs. $\leq 60$ years)             | 1     |
| Intermediate low (1)               | Ann Arbor stage (III-IV vs. I-II)                  | 1     |
| Intermediate high (2)              | Distant extranodal involvement (yes vs. no)        | 1     |
| High risk ( $\geq 3$ )             | Nonnasal disease (yes vs. no)                      | 1     |
|                                    | PNI (PNI $<49$ vs. PNI $\geq 49$ )                 | 1     |

**PNI**, Prognostic nutritional index; **LDH**, lactate dehydrogenase; **ECOG**, Eastern Cooperative Oncology Group; **IPI**, International Prognostic Index; **KPI**, Korean Prognostic Index; **PINK**, Prognostic index of natural killer lymphoma.

Supplementary Figures

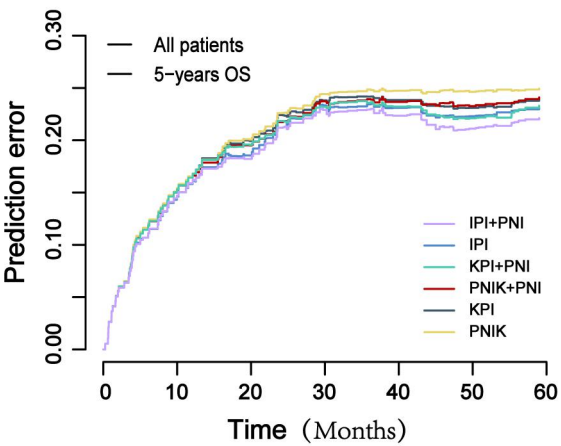

**Supplementary Figure 1.** Prognostic power evaluation of PNI. The IBS values of different models.
